# Supplementary material
Source: PubMed Central journal article supplement (PMC3409792)
Supplement: 1208984109_pnas.201208984SI.pdf [file 1208984109_pnas.201208984SI.pdf]

# Supporting Information

West et al. 10.1073/pnas.1208984109

## SI Materials and Methods

### VRC01-Like Antibodies That Lack Some PVL Characteristic Residues.

Although many VRC01-like antibodies that lack one or more of the potent VRC01-like (PVL) characteristic residues are clearly less broad and potent than the main PVL antibodies (Abs), a few have nearly the same activity. For example, VRC-H5, VRC03 heavy chain paired with the VRC01 light chain, and 12A21 have very strong neutralization profiles (1–3). VRC03<sub>HC</sub>/VRC01<sub>LC</sub> and VRC-H5 lack Trp100<sub>B<sub>HC</sub></sub>. In the crystal structure of VRC03<sub>HC</sub>/VRC03<sub>LC</sub> complexed with gp120 (3), Asn279<sub>gp120</sub> is hydrogen bonded to Asp100<sub>C<sub>HC</sub></sub>, rather than Phe100<sub>D<sub>HC</sub></sub>, the residue that occupies the usual location for Trp100<sub>B<sub>HC</sub></sub>. Inspection of the sequence of VRC-H5 in this region suggests that the roles that Trp100<sub>B<sub>HC</sub></sub> normally plays can instead be performed by a large hydrophobic residue (e.g., Phe or Leu) at position 100B paired with a potential hydrogen bond donor or acceptor (e.g., Asn or Asp) at position 100A. Thus, the characteristic residues we have identified are not strictly necessary for potent neutralization. We suggest, however, that the most common path for Abs to develop broad VRC01-like activity is by possessing the PVL characteristic residues.

**Polymorphism at 50<sub>HC</sub> in the Human VH1-2 Gene.** The single-nucleotide polymorphism (SNP) that distinguishes VH1-2 alleles with Trp50<sub>HC</sub> (\*02, \*03, and \*04; nucleotide T) from those with Arg50<sub>HC</sub> (\*01 and \*05; nucleotide C) is RefSNP rs1065059 [National Center for Biotechnology Information dbSNP at [www.ncbi.nlm.nih.gov/projects/SNP/](http://www.ncbi.nlm.nih.gov/projects/SNP/)]. The minor allele frequency (those alleles encoding Arg50<sub>HC</sub>) is 23.0% (504 of 1,094 genomes or 2,188 chromosomes). Thus, if the minor allele is distributed evenly in the population, the fraction homozygous for the Arg50<sub>HC</sub> allele is  $0.23 \times 0.23 = 0.053 = 5.3\%$ .

**J Gene Segment Assignment for PVL Abs.** Previous analysis of the D and J<sub>H</sub> segments used by PVL Abs did not reveal a clear pattern of J gene segment use (1, 3). For example, VRC01, VRC-PG04, and VRC-CH31 Abs were reported to use IGHJ1\*01, IGHJ2\*01, and IGHJ4\*01, respectively (2, 3). However, the relatively high sequence identity between J<sub>H</sub> gene segments combined with the extensive hypermutation of PVL Abs makes the J<sub>H</sub> gene assignments uncertain.

One problem with definitive assignment of J<sub>H</sub> gene segments in Abs is that the number of nucleotides assumed to be removed by

exonuclease activity during V-D-J joining can affect the segment assigned to be the closest match. JoinSolver (4), which uses a different algorithm from that of ImmunoGeneTics (IMGT)/V-QUEST (5), assigns IGHJ1\*01 for VRC01 partially due to the assumption that 7 nt were removed from the J gene segment, whereas the average number of nucleotides removed from the 5' end of the J segment is 6 (6). Retention of the codon for Trp100<sub>B<sub>HC</sub></sub> within the J<sub>H</sub> gene segment requires removal of 4 or fewer nt. Examination of a set of human Abs derived from IGHJ2\*01 suggests that retention of these nucleotides is not uncommon (e.g., retention occurs in 7 of 10 of the IGHJ2\*01-containing Abs included in a previous study) (7).

To further explore the J gene segment assignment by IMGT/V-QUEST, we attempted to remove any bias caused by inclusion of the Trp100<sub>B<sub>HC</sub></sub>. Even if the Trp100<sub>B<sub>HC</sub></sub> codon is changed to CCT, a codon not found in any J<sub>H</sub> gene segment at that position, VRC-PG04 and 3BNC117 are still predicted by IMGT/V-QUEST to derive from IGHJ2\*01, whereas VRC01 and 12A12 are then predicted to derive from IGHJ1\*01 and IGHJ4\*02, respectively.

### Sequence Features That Vary Among PVL Abs, Including Insertions, Deletions, and Variations Within the CDRs.

Although PVL Abs share common features, other aspects of these Abs vary considerably. For example, the CDRH1 length varies between 10 in many PVLs; 11 in VRC-PG04, VRC-H12, VRC-H15; and 19 in VRC-CH31 and related clones (1–3). For PVLs VRC01 and NIH45–46, CDRH1 disulfide bonds with CDRH3. Although Trp100<sub>B<sub>HC</sub></sub> near the C-terminal end of CDRH3 is common to PVL Abs, the preceding portion of CDRH3 is highly variable. For some PVL Abs, this region of CDRH3 may contact the inner domain of gp120, as observed for NIH45–46 (8), whereas the shorter VRC01 CDRH3 does not.

In the light chain, the CDRL1 length is quite variable: 7 in the 3BNC clones; 9 in VRC01, NIH45–46, and VRC-PG04; and 11 in 12A12 and the VRC-CH31-related clones (1–3). The shorter versions are deletions from the germ line.

Several insertions also occur in PVL Abs. In VRC03, in framework region 3 (after Arg71<sub>HC</sub>) there is a seven-residue insertion. In 3BNC60 and related potent clonal variants, there is a four-residue insertion (sequence WDFD) in apparently the same location. When these Abs are complexed with gp120, these insertions are predicted to contact the V1V2 base in the bridging sheet (1).

1. Scheid JF, et al. (2011) Sequence and structural convergence of broad and potent HIV antibodies that mimic CD4 binding. *Science* 333:1633–1637.
2. Wu X, et al. (2010) Rational design of envelope identifies broadly neutralizing human monoclonal antibodies to HIV-1. *Science* 329:856–861.
3. Wu X, et al.; NISC Comparative Sequencing Program (2011) Focused evolution of HIV-1 neutralizing antibodies revealed by structures and deep sequencing. *Science* 333:1593–1602.
4. Souto-Carneiro MM, Longo NS, Russ DE, Sun HW, Lipsky PE (2004) Characterization of the human Ig heavy chain antigen binding complementarity determining region 3 using a newly developed software algorithm, JOINSOLVER. *J Immunol* 172:6790–6802.
5. Brochet X, Lefranc MP, Giudicelli V (2008) IMGT/V-QUEST: The highly customized and integrated system for IG and TR standardized V-J and V-D-J sequence analysis. *Nucleic Acids Res* 36(Web Server issue):W503–W508.
6. Souto-Carneiro MM, Sims GP, Girschick H, Lee J, Lipsky PE (2005) Developmental changes in the human heavy chain CDR3. *J Immunol* 175:7425–7436.
7. Jackson KJ, Gaeta B, Sewell W, Collins AM (2004) Exonuclease activity and P nucleotide addition in the generation of the expressed immunoglobulin repertoire. *BMC Immunol* 5:19.
8. Diskin R, et al. (2011) Increasing the potency and breadth of an HIV antibody by using structure-based rational design. *Science* 334:1289–1293.

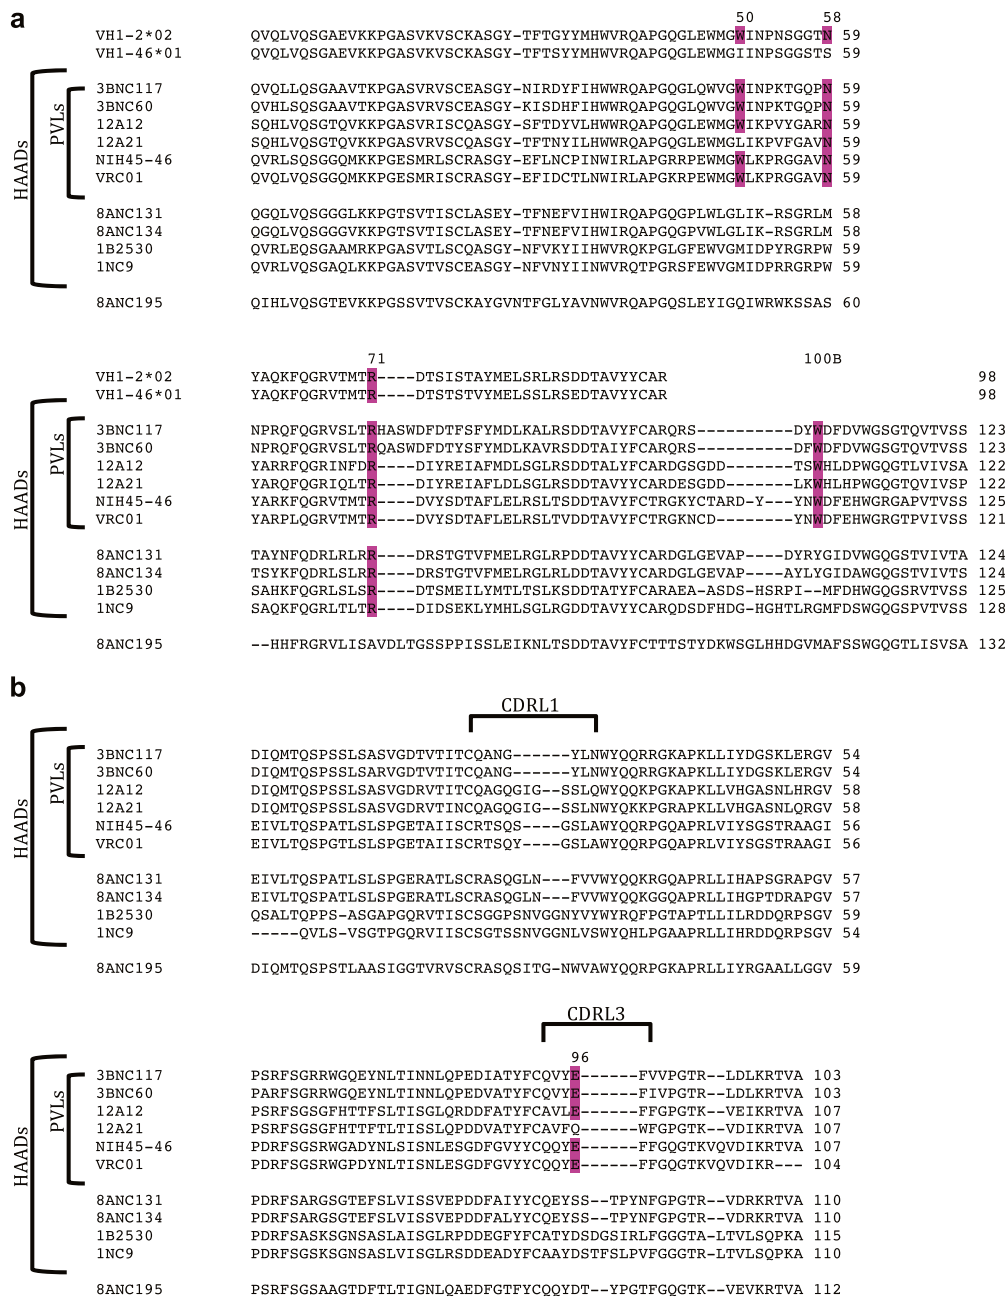

**Fig. S1.** Sequence alignment of CD4 binding site Abs. (A) Sequence alignment of highly active agonistic anti-CD4bs (HAAD) heavy chains, precursor germ-line V gene segments (Upper), and the 8ANC195 heavy chain (1). Characteristic PVL residues are highlighted in purple. (B) Sequence alignment of HAAD and 8ANC195 light chains (1). Characteristic PVL residues are highlighted in purple.



Full amino acid sequence:

(signal peptide)  
MGWSCIIILFLVATATGVHS

(VH)  
QVQLVQSGAEVKKPGASVKVSCASGYTFTGYYMHVWRQAPGQGLEWMGWINPNSG  
GTNYAQKFQGRVTMTRDSISTAYMELSRLRSDDTAVYYCARQRSDFWDFDLWGRGTLVTVSS

(CH1-CH3)  
ASTKGPSVFPLAPSSKSTSGGTAALGCLVKDYFPEPVTVSWNSGALTSGVHTFPAVLQSGLYSLSSVTVPSSSLGTQTYICNVNHKPSNTKVDKRVKVEPKSCDKTHTCPPCPAPELLG  
GPSVFLFPPKPKDTLMISRTPEVTCVVVDVSHEDPEVKFNWYVDGVEVHNAKTKPREEQ  
YNSTYRVVSVLTVLHQDWLNGKEYKCKVSNKALPAPIEKTKAKGQPREPQVYTLPPSR  
EEMTKNQVSLTCLVKGFYPSDIAVEWESNGQPENNYKTTTPVLDSDGSFFLYSKLTVDK  
SRWQQGNVVFSCSVMEALHNHYTQKLSLSLSPGK

Alignment of 3BNC60 germline (GL) with 3BNC60 mature heavy chain:

```
GL      QVQLVQSGAEVKKPGASVKVSCASGYTFTGYYMHVWRQAPGQGLEWMGWINPNSGGTNYA 61
        QV L QSGA V KPGASV+VSC+ASGY + +++HW RQAPGQGL+W+GWINP +G N
3BNC60 QVHLSQSGAAVTKPGASVRSCEASGYKISDFIHWWRQAPGQLQVWVWINPKTGQPNNP 61

GL      QKFQGRVTMTR---DTSISTAYMELSRLSDDTAVYYCARQRSDFWDFLWGRGTLVTVSS 119
        ++FQGRV++TR D + YM+L +RSDDTA+Y+CARQRSDFWDFD+WG GT VTVSS
3BNC60 RQFQGRVSLTRQASWDFDTYSFYMDLKAVRSDDTAIYFCARQRSDFWDFVWVSGTQVTVSS 123
```

**Fig. S4.** Sequence of the 3BNC60 germ-line heavy chain used in the surface plasmon resonance binding experiment shown in Fig. 4. The underlined sections match VH1-2\*02 and IGHJ2\*01. The red section (mainly the D gene segment and added nucleotides) matches the mature 3BNC60 heavy chain. Point mutants were made at the residues shown in blue. The germ-line construct is also shown aligned with the mature 3BNC60 heavy chain.

```

NIH45-46      QVRLSQSGGQMKKPGESMRLSCRAS---GYE-----FLNCPINWIRLAPGRRPEWMCWL 51
VRC01        QVQLVQSGGQMKKPGESMRISCRAS---GYE-----FIDCTLNWIRLAPGKRPEWMCWL 51
12A12       SQHLVQSGTQVKKPGASVRISQAS---GYS-----FTDYVLHWRQAPGQGLEWMCWI 51
3BNC117     QVQLLQSGAAVTKPGASVRVSCAS---GYN-----IRDYFIHWRQAPGQGLQVWGI 51
3BNC60      QVHLSQSGAAVTKPGASVRVSCAS---GYK-----ISDHFHWRQAPGQGLQVWGI 51
VRC-CH31    QVQLVQSGAAVRKPGASVTVSKFAEDDDYSPYWVNPAPDFHIFLRLQAPGQGLEWLAWM 60
VRC-PG04    QVQLVQSGSGVKKPGASVRVSCWTS-EDIFE-----RTELHWRQAPGQGLEWICWV 52
IGHV1-2*02 # QVQLVQSGAEVKKPGASVKVSKAS---GYT-----FTGYMHWRQAPGQGLEWMCWI 51
IGHV1-46*01 QVQLVQSGAEVKKPGASVKVSKAS---GYT-----FTSYMHWRQAPGQGLEWMCWI 51
IGHV1-8*01  QVQLVQSGAEVKKPGASVKVSKAS---GYT-----FTSYDINWRQATGQGLEWMCWI 51
IGHV1-18*01 QVQLVQSGAEVKKPGASVKVSKAS---GYT-----FTSYGISWRQAPGQGLEWMCWI 51
IGHV1-45*01 # QMQLVQSGAEVKKTGSSVKVSKAS---GYT-----FTYRYLHWRQAPGQALEWMCWI 51
IGHV1-58*01 # QMQLVQSGPEVKKPGTSVKVSKAS---GFT-----FTSSAVQVWRQARGQRLEWICWI 51
IGHV1-3*01  QVQLVQSGAEVKKPGASVKVSKAS---GYT-----FTSYAMHWRQAPGQGLEWMCWI 51
IGHV1-69*01 QVQLVQSGAEVKKPGSSVKVSKAS---GGT-----FSSYAIHWRQAPGQGLEWMCWI 51
IGHV1-f*01  EVQLVQSGAEVKKPGATVKISCKVS---GYT-----FTDYMHWRQAPGKGLEWMCWI 51
IGHV1-24*01 QVQLVQSGAEVKKPGASVKVSKVS---GYT-----LTELSMHWRQAPGKGLEWMCWI 51
IGHV1-68*01 # QVQLGQSEAEVKKPGASVKVSKAS---GYT-----FTCCSLHWLQAPGQGLERMCWI 51
IGHV1-c*01  QVQLVQSWAEVRKSGASVKVSCSFS---GFT-----ITSYGIHWRQSPGQGLEWMCWI 51
                                                    50

NIH45-46      KPRGGAVNY-ARKFQGRVTMTR----DVYSDTAFLELRSLTSDDTAVYFCTRGRKYCTARD 106
VRC01        KPRGGAVNY-ARPLQGRVTMTR----DVYSDTAFLELRSLTVDDTAVYFCTRGNKCD--- 103
12A12       KPVIYGARNY-ARRFQGRINFDK----DIYREIAFMDLSGLRSDDTALYFCARDGSGDD-- 104
3BNC117     NPKTGQPNN-PRQFQGRVSLTRHASWDFDTFSFYMDLKALRSDDTAVYFCAR-----QR 104
3BNC60      NPKTGQPNN-PRQFQGRVSLTRQASWDFDTFSFYMDLKAVRSDDTAVYFCAR-----QR 104
VRC-CH31    NPTNGAVNY-AWYLNQGRVTATR----DRSMTAFLEVKSLRSDDTAVYCARAQKRRGR-- 113
VRC-PG04    KTVTGAVNYFGSPDFRQRVSLTR----DRDLFTAHDIRGLTQGDATYFCARQKFFYTG-- 107
IGHV1-2*02 # NPNSGGTNY-AQKFQGRVTMTR----DTSISTAYMELSLRSDDTAVYYCAR----- 98
IGHV1-46*01 NPSGGSTY-AQKFQGRVTMTR----DTSTSTVYMESSLRSEDATVYYCAR----- 98
IGHV1-8*01  NPNSGNTGY-AQKFQGRVTMTR----NTSISTAYMELSSLRSEDATVYYCAR----- 98
IGHV1-18*01 SAYNGNTNY-AQKLQGRVTMTT----DTSTSTAYMELSLRSDDTAVYYCAR----- 98
IGHV1-45*01 # TPFNGNTNY-AQKFQDRVTITR----DRSMSTAYMELSSLRSEDATVYYCAR----- 98
IGHV1-38*01 # VVGSNTNY-AQKFQERVITR----DMSTSTAYMELSSLRSEDATVYYCAR----- 98
IGHV1-3*01  NAGNGNTKY-SQKFQGRVTITR----DTSASTAYMELSSLRSEDATVYYCAR----- 98
IGHV1-69*01 IPIFGTANY-AQKFQGRVTITA----DESTSTAYMELSSLRSEDATVYYCAR----- 98
IGHV1-f*01  DPEDGETIY-AEKFQGRVTITA----DTSTDTAYMELSSLRSEDATVYYCAT----- 98
IGHV1-24*01 DPEDGETIY-AQKFQGRVTMTE----DTSTDTAYMELSSLRSEDATVYYCAT----- 98
IGHV1-68*01 # TLYNGNTNY-AKKFQGRVTITR----DMSLRTAYIELSSLRSEDSAVYYWAR----- 98
IGHV1-c*01  NPNGNSPSY-AKKFQGRFTMTR----DMSTTAYITDLSSLTSEDMAVYYAR----- 98
                                                    58          71

NIH45-46      YYNWDFEHWGRGAPVTVSS 125
VRC01        -YNWDFEHWGRGTPVIVSS 121
12A12       -TSWHLDPWGQGLVIVSA 122
3BNC117     SDYWDFDVGSGTQVTVSS 123
3BNC60      SDFWDFDVGSGTQVTVSS 123
VRC-CH31    -SEWAYAHWGQGTPTVVVSS 131
VRC-PG04    -QQWYFDLWGRGTLVIVSS 125
                                                    100B

```

Fig. S5. Alignment of PVL heavy-chain sequences with IGHV1 gene segments. PVL characteristic residues are highlighted in purple. Germ-line segments indicated with “#” have PVL characteristic residues Trp50<sub>HC</sub>, Asn58<sub>HC</sub>, and Arg71<sub>HC</sub>.

| VRC01  | Clone      | 270                         | 280         | 450   | 460                           | 470 |
|--------|------------|-----------------------------|-------------|-------|-------------------------------|-----|
| IC50   | Consensus  | EVVIRSSNFTDIAKIIII          | IRGLLLTRDGG | ----- | NSTNNTETFRPG                  |     |
|        | HxBc2      | EVVIRSSNFTDIAKIIII          | IRGLLLTRDGG | ----- | NSNNESEIFRPG                  |     |
| 0.017  | 1_95C5     | DI...E...K...T...N...       | .....V..... | ..... | -----ENVV                     |     |
| 0.020  | 45_01dG5   | I...E...IK.....             | .....       | ..... | -----SSTNGT                   |     |
| 0.041  | 1_01B5     | DI...E...K...TNT..          | .....       | ..... | -----EDQ...I...               |     |
| 0.049  | 45_01dH5   | .....D...K.....             | .....       | ..... | -----G.....                   |     |
| 0.089  | N26_07TC40 | ..I...D...SN...T...         | .....       | ..... | -----NEDNGGP.....             |     |
| 0.143  | N90_08B11  | .....                       | .....       | ..... | -----IN.....                  |     |
| 0.328  | N90_08B16  | .....                       | .....       | ..... | -----KN.....                  | A   |
| 0.372  | N90_08A19  | .....                       | .....       | ..... | -----KN.....                  | A   |
| 0.591  | N26_07A38  | ..I...A...LM...T...         | ..I.....    | ..... | -----D.KDN.....               | A   |
| 0.644  | N90_08B6   | .....                       | .....       | ..... | -----KN.....                  | A   |
| 0.661  | 18_99A27   | ..I...E...I...N...T...      | .....       | ..... | -----NETNKT...I...            | A   |
| 0.703  | N90_08B2   | .....                       | .....       | ..... | -----IN.....                  | A   |
| 0.855  | 18_99B19   | ..I...E...ISN...T...        | .....       | ..... | -----HGN.ETD.....             | E   |
| 1.000  | N90_08A15  | .....                       | .....       | ..... | -----IN.....                  | A   |
| 1.100  | 18_99TB13  | ..I...E...I...N...T...      | .....       | ..... | -----HGN.ETD.....             | E   |
| 1.200  | 18_99B51   | ..I...E...ISN...T...        | .....       | ..... | -----HGN.ETD.....             | E   |
| 1.300  | N90_08A16  | .....                       | .....       | ..... | -----IN.....                  | A   |
| 1.300  | N90_08A25  | .....                       | .....       | ..... | -----KN.....                  | A   |
| 1.600  | N26_07A21  | ..I...A...S...T...          | .....       | ..... | -----NNNDRTNNGSDS..NSTQ..I... | A   |
| 1.600  | 18_99B46   | ..II...E...I...N...T...     | .....       | ..... | -----HGN.ETD.....             | E   |
| 1.700  | N90_08B17  | .....                       | .....       | ..... | -----IN..N.....               | A   |
| 1.900  | 18_99B15   | ..I...E...L...S...V...T...  | .....       | ..... | -----HGN.ETD.....             | E   |
| 2.300  | B7B5_88A2  | .....A...SN...V...T...      | .....       | ..... | -----E..Q.....                |     |
| 2.500  | N90_08A13  | .....                       | .....       | ..... | -----IN..N.....               | A   |
| 2.900  | N90_08B4   | .....                       | .....       | ..... | -----IN..N.....               | A   |
| 3.100  | B7B5_88A3  | .....A...SN...V...T...      | .....       | ..... | -----E..QN.....               |     |
| 3.500  | B7B5_88A6  | .....A...SN...V...T...      | .....       | ..... | -----E..Q.....                |     |
| 3.500  | 18_99A34   | ..I...E...L...S...V...T...  | .....       | ..... | -----HGN.ETD.....             | E   |
| 3.600  | 45_01dH1   | ..II...E...L...T...         | .....       | ..... | -----NI..TNETT.....           |     |
| 4.800  | 18_99B1    | ..I...E...I...N...T...      | .....       | ..... | -----HGN.ETD.....             | E   |
| 9.600  | B7B5_88TB2 | .....E...S...V...N...       | .....       | ..... | -----YK.....NESN.SNESKP.....  |     |
| 11.400 | B7B5_88TB3 | .....E...S...V...N...       | .....       | ..... | -----YK.....NESN.SNESKP.....  |     |
| 11.500 | 1_01A20    | DI..L...E...K...SNN..       | .....       | ..... | -----NT.SQS.T.....            |     |
| 14.600 | 1_95TC14   | DI...E...K...T...T...       | .....       | ..... | -----KT..QS.T.....            |     |
| 17.000 | B7B5_88A1  | .....A...S...V...T...       | .....       | ..... | -----GN.E..P.N.....           |     |
| 17.500 | 45_06A3    | ..IM...PK...ISE...DD...     | .....       | ..... | -----NIT..E.IT.....Q          |     |
| 19.000 | N26_07B18  | ..II...EDL...R...E...T...   | .....       | ..... | -----NSST..NNGSDS..NSTK..I... |     |
| 19.300 | N26_07TC39 | ..I...A...M...T...          | .....       | ..... | -----NDTNHEN.....             |     |
| 25.900 | B7B5_88A10 | .....A...S...V...T...       | .....       | ..... | -----V.....-ESSSN.....        |     |
| 31.200 | 45_06C7    | ..IM...PK...ISE...DD...     | .....       | ..... | -----NIT..E.IT.....Q          |     |
| 50.000 | 45_01A8    | ..II...E...L...K...Q...T... | .....       | ..... | -----NI..TNE.T.....           |     |
| 50.000 | 45_01A10   | ..II...E...L...E...H...T... | .....       | ..... | -----NI..TNK.T.....E          |     |
| 50.000 | 45_01A14   | ..II...R...LSE...DDT...     | .....       | ..... | -----NI..TNETT.....           |     |
| 50.000 | 45_01A21   | ..II...E...L...K...Q...T... | .....       | ..... | -----NI..TNK.T.....E          |     |
| 50.000 | 45_01B14   | ..II...E...L...R...Q...T... | .....       | ..... | -----NI..TNK.T.....E          |     |
| 50.000 | 45_01E8    | ..II...E...L...E...H...T... | .....       | ..... | -----NI..TNE.T.....           |     |
| 50.000 | 45_01E11   | ..II...E...L...E...H...T... | .....       | ..... | -----NI..TNK.T.....E          |     |
| 50.000 | 45_01E17   | ..II...E...L...E...H...T... | .....       | ..... | -----NI..TNK.T.....E          |     |
| 50.000 | 45_01F4    | ..II...E...L...E...H...T... | .....       | ..... | -----NI..TNE.T.....           |     |
| 50.000 | 45_06A1    | ..IM...PK...LSE...DD...     | .....       | ..... | -----NI..TDK.....Q            |     |
| 50.000 | 45_06A2    | ..II...E...L...A...H...T... | .....       | ..... | -----NIT..E.IT.....Q          |     |
| 50.000 | 45_06A4    | ..II...E...L...E...H...T... | .....       | ..... | -----NI..TDK.....Q            |     |
| 50.000 | 45_06A8    | ..II...E...L...A...H...T... | .....       | ..... | -----NIT..E.IT.....Q          |     |
| 50.000 | 45_06A10   | ..I...R...LSE...DD...       | .....       | ..... | -----NIT..E.IT.....Q          |     |
| 50.000 | 45_06C8    | ..II...E...L...A...H...T... | .....       | ..... | -----NIT..E.IT.....E          |     |
| 50.000 | 45_09A5    | ..II...E...L...E...H...T... | .....       | ..... | -----NIT..K..I.T.....Q        |     |
| 50.000 | 45_09A6    | ..I...R...LSE...D...        | .....       | ..... | -----NIT..E.IT.....Q          |     |
| 50.000 | 45_09A10   | ..IM...PK...ISE...DD...     | .....       | ..... | -----NIT..E.IT.....Q          |     |
| 50.000 | 45_09B3    | ..I...R...LSE...D...        | .....       | ..... | -----NIT..E.IT.....Q          |     |
| 50.000 | 45_09C5    | ..I...E...L...A...H...T...  | .....       | ..... | -----D.....IT..E.IT.....Q     |     |
| 50.000 | 45_09C8    | ..IM...PK...ISE...DD...     | .....       | ..... | -----NIT..E.IT.....Q          |     |
| 50.000 | 45_09C20   | ..II...E...L...E...H...T... | .....       | ..... | -----NIT..E.IT.....Q          |     |
| 50.000 | 45_09C26   | ..IM...PK...ISE...DD...     | .....       | ..... | -----NIT..E.IT.....Q          |     |
| 50.000 | 45_09TA1   | ..I...R...LSE...D...        | .....       | ..... | -----NIT..E.IT.....Q          |     |
| 50.000 | 1_95A21    | DI...E...K...T...T...       | .....       | ..... | -----ENVV..I.....             |     |
| 50.000 | 1_95C1     | DI...E...K...T...T...       | .....       | ..... | -----ENVV.....                |     |
| 50.000 | 1_95C10    | DI...E...K...T...T...       | .....       | ..... | -----ENVV.....                |     |
| 50.000 | 1_95TC1    | DI...E...H...T...T...       | .....       | ..... | -----EDQ..K..I.....           |     |
| 50.000 | 1_95TC6    | DI...E...K...T...T...       | .....       | ..... | -----ENVV..I.....             |     |
| 50.000 | 1_95TC13   | DI...E...H...T...T...       | .....       | ..... | -----EDO..K.....              |     |
| 50.000 | 1_01A10    | DI..L...E...K...SNN..       | .....       | ..... | -----NT.SQS.T.....            |     |
| 50.000 | 1_01A19    | DI..L...E...K...SNN..       | .....       | ..... | -----NT.SQS.M.....            |     |
| 50.000 | 1_01B3     | DI..L...E...E...SNN..       | .....       | ..... | -----NT.SQS.M.....            |     |
| 50.000 | 1_01TB5    | DI..L...E...E...S...T...    | .....       | ..... | -----NT.SQS.T.....            |     |
| 50.000 | 1_06B1     | DI..L...E...K...SNN..       | .....       | ..... | -----NT..QS.T.....            |     |
| 50.000 | 1_06B3     | DI..L...E...E...SNN..       | .....       | ..... | -----NT..QS.A.....            |     |
| 50.000 | 1_06B7     | DI..L...E...K...SNN..       | .....       | ..... | -----NT..QS.T.....            |     |
| 50.000 | 1_06B9     | DI..L...E...K...SNN..       | .....       | ..... | -----NT..QS.T.....            |     |
| 50.000 | 1_06C3     | DI..L...E...E...SNN..       | .....       | ..... | -----NT..QS.T.....            |     |
| 50.000 | 1_06C5     | DI..L...E...E...SNN..       | .....       | ..... | -----NT.SQS.T.....            |     |
| 50.000 | 1_06D29    | DI..L...E...K...SNN..       | .....       | ..... | -----NT..QS.T.....            |     |
| 50.000 | N26_07A10  | ..II...EDLN...H...N...      | .....       | ..... | -----D.KDN.....               |     |
| 50.000 | N26_07A14  | ..II...EDL...R...E...T...   | .....       | ..... | -----D.KDN.....               |     |
| 50.000 | N26_07A16  | ..I...EDLN...H...N...       | .....       | ..... | -----N..N.....                |     |
| 50.000 | N26_07A22  | ..I...EDLN...H...N...       | .....       | ..... | -----NSST..NNGSDS..NSTK..I... |     |
| 50.000 | N26_07B9   | ..II...EDL...R...E...T...   | .....       | ..... | -----NETKHEN.....             |     |
| 50.000 | N26_07B10  | ..II...EDL...K...E...T...   | .....       | ..... | -----D..DN.....               |     |
| 50.000 | N26_07B22  | ..II...EDLM...K...E...T...  | .....       | ..... | -----NNNSSTNNGSDS..NSTK..I... |     |
| 50.000 | N26_07B36  | ..I...A...LM...T...         | .....       | ..... | -----NETKHEN.....             |     |
| 50.000 | N26_07B41  | ..I...EDLN...H...N...       | .....       | ..... | -----D.KDN.....               |     |
| 50.000 | B7B5_88A4  | .....E...S...V...T...       | .....       | ..... | -----V.....-QNSSN.....        |     |
| 50.000 | B7B5_88A5  | .....E...S...V...T...       | .....       | ..... | -----DN.E..SIN.....           |     |
| 50.000 | B7B5_88A7  | .....E...S...E...V...T...   | .....       | ..... | -----D..SIN.....              |     |
| 50.000 | B7B5_88TB1 | .....E...S...V...T...       | .....       | ..... | -----V.....-QNSSN.....        |     |
| 50.000 | B7B5_88TB6 | .....E...S...V...T...       | .....       | ..... | -----V.....-ENSSD.....        |     |
| 50.000 | 18_99A38   | ..I...E...L...S...V...T...  | .....       | ..... | -----YGN.ETD.T.....           |     |
| 50.000 | 18_99B27   | ..I...E...L...S...V...T...  | .....       | ..... | -----HGN.ETD.....E            |     |
| 50.000 | 18_99B39   | ..I...E...I...N...T...      | .....       | ..... | -----NETNKT.....E             |     |
| 50.000 | 18_99B48   | ..I...E...ISN...T...        | .....       | ..... | -----NETNKT.....E             |     |
| 50.000 | 18_99TA3   | ..I...E...S...V...T...      | .....       | ..... | -----HGN.DTD.T.....           |     |

**Fig. S6.** Sequences of envelopes from donor 45 and four other individuals as reported in ref. 1. Sequences for residues 269–285 and 449–471 are shown; strains are listed in order of their VRC01 IC<sub>50</sub>. Residues 279, 280, and 456–459 are highlighted.

1. Wu X, et al. (2012) Selection pressure on HIV-1 envelope by broadly neutralizing antibodies to the conserved CD4-binding site. *J Virol* 86:5844–5856.

**Table S1. Classification of CD4-binding site Abs**

| Class                                                                        | Members                                                                                                                                                                                                               |
|------------------------------------------------------------------------------|-----------------------------------------------------------------------------------------------------------------------------------------------------------------------------------------------------------------------|
| PVL Abs, neutralizing >75% of strains                                        | VRC01, VRC02<br>NIH45–46<br>3BNC60, 3BNC117, 3BNC62, 3BNC95, 3BNC176<br>12A12<br>VRC-PG04<br>VRC-CH31, VRC-CH30, VRC-CH32, VRC-CH33, VRC-CH34<br>VRC03HC/VRC01LC<br>gVRC-H5(d74)/VRC-PG04LC gVRC-H12(d74)/VRC-PG04LC* |
| Almost PVL Abs, related to known<br>PVL Abs, neutralizing 10–75% of strains  | VRC03<br>VRC01HC/VRC03LC<br>3BNC55, 3BNC91, 3BNC104, 3BNC89<br>12A21<br>VRC-PG04b                                                                                                                                     |
| Defective PVL Abs, related to known<br>PVL Abs, neutralizing <10% of strains | 3BNC42, 3BNC53, 3BNC66, 3BNC72, 3BNC102<br>3BNC108, 3BNC142, 3BNC153, 3BNC156, 3BNC158<br>Germ-line parents of PVL Abs                                                                                                |
| Non-PVL HAADs                                                                | 8ANC131<br>8ANC134<br>1B2530<br>1NC9<br>And related clones                                                                                                                                                            |
| Other CD4-binding site Abs                                                   | HJ16 <sup>†</sup><br>b12<br>b13<br>F105<br>8ANC195                                                                                                                                                                    |

Antibodies are described in refs. 1–4.

\*Plus seven additional HC clones (paired with PG04 LC) from deep sequencing of donor 74.

<sup>†</sup>HJ16 sequences (patent WO2011092593) do not appear to be particularly similar to PVLs. CDRL3 is 9 aa long, the heavy chain does not derive from VH1-2, and the Ab is missing several of the signature PVL residues.

1. Corti D, et al. (2010) Analysis of memory B cell responses and isolation of novel monoclonal antibodies with neutralizing breadth from HIV-1-infected individuals. *PLoS ONE* 5:e8805.
2. Scheid JF, et al. (2011) Sequence and structural convergence of broad and potent HIV antibodies that mimic CD4 binding. *Science* 333:1633–1637.
3. Wu X, et al. (2010) Rational design of envelope identifies broadly neutralizing human monoclonal antibodies to HIV-1. *Science* 329:856–861.
4. Wu X, et al.; NISC Comparative Sequencing Program (2011) Focused evolution of HIV-1 neutralizing antibodies revealed by structures and deep sequencing. *Science* 333:1593–1602.

**Table S2. Cross-species analysis for the presence of PVL characteristic residues in heavy-chain V gene segments**

| Species        | No. V <sub>H</sub> s examined | No. w/W50 and R71 | No. w/W50, N58, and R71 |
|----------------|-------------------------------|-------------------|-------------------------|
| Human          | 70                            | 7*                | 4 <sup>†</sup>          |
| Mouse          | 269                           | 0                 | 0                       |
| Rat            | 204                           | 1 <sup>‡</sup>    | 0                       |
| Rabbit         | 49                            | 2 <sup>§</sup>    | 0                       |
| Sheep          | 10                            | 0                 | 0                       |
| Pig            | 5                             | 0                 | 0                       |
| Rhesus macaque | 89                            | 1 <sup>¶</sup>    | 0                       |

V<sub>H</sub> gene segment sequences from the IMGT database were examined, except for the macaque sequences, which were obtained from the Rhesus macaque Ig gene database ([http://www.kcl.ac.uk/immunobiology/Mac\\_ig/](http://www.kcl.ac.uk/immunobiology/Mac_ig/)). For the human genes, all V<sub>H</sub> alleles in IMGT were also checked.

\*VH1-2\*02, VH1-45\*01, VH1-58\*01, VH1-68\*01, VH1-c\*01, VH1-3\*01, and VH1-8\*01.

<sup>†</sup>VH1-2\*02, VH1-45\*01, VH1-58\*01, and VH1-68\*01 (pseudogene).

<sup>‡</sup>IGHV12S1\*01.

<sup>§</sup>IGHV1555\*01 and IGHV1556\*01.

<sup>¶</sup>IGHV11.

**Table S3. HIV-1 strains with sequence variations at critical PVL contact residues: Analysis based on NIH45–46 data as described in ref. 1**

| Strain                                | Critical contact residues on gp120 |     |     |     |       | IC <sub>50</sub> , μg/mL |          |          |         |
|---------------------------------------|------------------------------------|-----|-----|-----|-------|--------------------------|----------|----------|---------|
|                                       | 279                                | 280 | 456 | 458 | 459   | VRC01                    | NIH45–46 | VRC-PG04 | 3BNC117 |
| Residue in most PVL-sensitive strains | Asx                                | Asn | Arg | Gly | Gly   |                          |          |          |         |
| 620345_c1                             | Lys                                |     | Ser |     | Asp   | >50                      | >50      | >50      | >15     |
| 89_F1_2_25                            |                                    |     | Ser | Asn |       | ND                       | >50      | ND       | >50     |
| 6540_v4_c1                            |                                    | Ser | Ser | Tyr |       | >50                      | >50      | >50      | >50     |
| 6545_v4_c1                            |                                    | Ser | Ser | Tyr |       | >50                      | >50      | ND       | >50     |
| Du422.1                               |                                    |     | Trp |     |       | >50                      | >50      | >50      | >50     |
| T250_4                                |                                    |     |     |     | Pro   | >50                      | >50      | >50      | >15     |
| T278_50                               | Ala                                |     |     |     | Glu   | >50                      | >50      | >50      | >15     |
| Ce1172_H1                             |                                    |     |     |     | –/Ile | ND                       | >50      | ND       | >50     |
| X2088_c9                              |                                    |     |     |     | Val   | >50                      | >50      | >50      | >50     |
| H086.8                                | Lys                                |     |     |     | Asp   | >50                      | >30      | >50      | >15     |

Neutralization data are from refs. 2–4. Position 279<sub>gp120</sub> was previously shown to be important in resistance to VRC01; specifically the effects of mutation D279A<sub>gp120</sub> in JRC5F, T278\_50, BL01, and TV1\_29 viral strains were evaluated (5).

1. Diskin R, et al. (2011) Increasing the potency and breadth of an HIV antibody by using structure-based rational design. *Science* 334:1289–1293.
2. Scheid JF, et al. (2011) Sequence and structural convergence of broad and potent HIV antibodies that mimic CD4 binding. *Science* 333:1633–1637.
3. Wu X, et al. (2010) Rational design of envelope identifies broadly neutralizing human monoclonal antibodies to HIV-1. *Science* 329:856–861.
4. Wu X, et al. (2009) Mechanism of human immunodeficiency virus type 1 resistance to monoclonal antibody B12 that effectively targets the site of CD4 attachment. *J Virol* 83:10892–10907.
5. Li Y, et al. (2011) Mechanism of neutralization by the broadly neutralizing HIV-1 monoclonal antibody VRC01. *J Virol* 85:8954–8967.
